# Supplementary material for: Halogen bonding from the bonding perspective with considerations for mechanisms of thyroid hormone activation and inhibition
Source: Royal Society of Chemistry journal article supplement (doi:10.1039/c8nj00557e), 2018-01-01
Supplement: c8nj00557e1.pdf [file c8nj00557e1.pdf]

## Supporting information for

Halogen Bonding from the Bonding Perspective with Considerations for Mechanisms of Thyroid  
Hormone Activation and Inhibition

C.A. Bayse

M06-2X/aug-cc-pvtz results:

R-X molecules

| bs2          | E            | C-X, ang | %xC-I | 100-%C-I | %xp C-X | $\epsilon$ HOMO | $\epsilon\phi$ R-X* |
|--------------|--------------|----------|-------|----------|---------|-----------------|---------------------|
| MeF          | -139.74222   | 1.3797   | 71.80 | 28.20    | 73.14   | -0.42982        | 0.01510             |
| EtF          | -179.05580   | 1.3886   | 72.20 | 27.80    | 72.84   | -0.40573        | 0.01286             |
| PhF          | -331.47681   | 1.3430   | 71.95 | 28.05    | 69.67   | -0.30942        | 0.03586             |
| 4F-Pyr       | -347.51819   | 1.3355   | 71.82 | 28.18    | 69.41   | -0.33703        | 0.01906             |
| HCCF         | -176.55288   | 1.2749   | 70.80 | 29.20    | 69.07   | -0.35875        | 0.00732             |
| MeCl         | -500.10670   | 1.7825   | 56.02 | 43.98    | 83.27   | -0.36236        | 0.00988             |
| CF3Cl        | -797.87613   | 1.7574   | 53.96 | 46.04    | 86.84   | -0.42647        | 0.00858             |
| CCl4         | -1878.90543  | 1.7684   | 50.15 | 49.85    | 83.72   | -0.38628        | -0.02504            |
| PhCl         | -691.83541   | 1.7406   | 54.63 | 45.37    | 80.94   | -0.30560        | 0.03134             |
| 4Cl-Pyr      | -707.87586   | 1.7342   | 54.23 | 45.77    | 80.91   | -0.33744        | 0.01675             |
| 1,3,5-Cl3Ph  | -1611.05374  | 1.7334   | 53.93 | 46.07    | 81.22   | -0.32195        | 0.01332             |
| EtCl         | -539.41735   | 1.7968   | 56.52 | 43.48    | 83.38   | -0.35782        | 0.02675             |
| C6F5Cl       | -1188.05075  | 1.7120   | 51.69 | 48.31    | 82.20   | -0.33332        | -0.02461            |
| C6Cl6        | -2989.85933  | 1.7168   | 51.96 | 48.04    | 81.88   | -0.31909        | -0.02648            |
| 3,4,5-Cl3Pyr | -1627.08740  | 1.7122   | 52.30 | 47.70    | 81.22   | -0.32660        | -0.00276            |
| HCCCl        | -536.92664   | 1.6397   | 51.87 | 48.13    | 79.79   | -0.34165        | 0.00707             |
| MeCCCl       | -576.24419   | 1.6446   | 51.87 | 48.13    | 80.02   | -0.31955        | 0.00498             |
| MeBr         | -2614.14242  | 1.9394   | 52.41 | 47.59    | 86.62   | -0.33815        | 0.00088             |
| CF3Br        | -2911.90695  | 1.9267   | 50.68 | 49.32    | 89.99   | -0.38899        | -0.01096            |
| CCl3Br       | -3992.93828  | 1.9443   | 44.95 | 55.05    | 88.25   | -0.36620        | -0.04189            |
| CBr4         | -10335.03876 | 1.9364   | 44.87 | 55.13    | 87.06   | -0.34970        | -0.06586            |
| CHBr3        | -7761.41234  | 1.9268   | 47.07 | 52.93    | 87.21   | -0.34449        | -0.04170            |
| CH2Br2       | -5187.77987  | 1.9261   | 49.65 | 50.35    | 87.08   | -0.34476        | -0.01704            |

|                  |              |        |       |       |       |          |          |
|------------------|--------------|--------|-------|-------|-------|----------|----------|
| PhBr             | -2805.86897  | 1.8962 | 50.73 | 49.27 | 84.78 | -0.30172 | 0.01458  |
| C6F5Br           | -3302.08596  | 1.8678 | 47.34 | 52.66 | 86.05 | -0.32859 | -0.02752 |
| C6Cl5Br          | -5103.89252  | 1.8753 | 47.53 | 52.47 | 85.84 | -0.31654 | -0.03427 |
| C6Br6            | -15674.05524 | 1.8791 | 47.53 | 52.47 | 85.81 | -0.31158 | -0.05367 |
| 1,3,5-Br3Ph      | -7953.15440  | 1.8902 | 49.86 | 50.14 | 85.11 | -0.31673 | -0.01473 |
| 4ClPhBr          | -3265.47889  | 1.8927 | 50.33 | 49.67 | 84.88 | -0.30081 | 0.01089  |
| 4MePhBr          | -2845.17986  | 1.8962 | 50.79 | 49.21 | 84.76 | -0.29195 | 0.01926  |
| 4NMe2PhBr        | -2939.82609  | 1.8961 | 50.88 | 49.12 | 84.74 | -0.24892 | 0.02164  |
| 4COOHPhBr        | -2994.46272  | 1.8909 | 50.37 | 49.63 | 84.70 | -0.31457 | 0.01199  |
| 4CONH2PhBr       | -2974.58399  | 1.8918 | 50.42 | 49.58 | 84.78 | -0.31055 | 0.01302  |
| 4CONHMePhBr      | -3013.88474  | 1.8926 | 50.48 | 49.52 | 84.78 | -0.30742 | 0.01237  |
| 4Br-Pyr          | -2821.90922  | 1.8896 | 50.21 | 49.79 | 84.78 | -0.33026 | 0.00813  |
| 3,4,5-Br3Pyr     | -7969.18764  | 1.8723 | 47.89 | 52.11 | 85.25 | -0.31954 | -0.02547 |
| HCCBr            | -2650.96174  | 1.7916 | 47.17 | 52.83 | 83.92 | -0.33367 | 0.00391  |
| MeCCBr           | -2690.27964  | 1.7953 | 47.23 | 52.77 | 84.11 | -0.31383 | 0.00647  |
| Br4-ethene       | -10373.13377 | 1.8768 | 46.73 | 53.27 | 85.95 | -0.30832 | -0.01980 |
| cis-Br2-ethene   | -5225.86160  | 1.8714 | 50.31 | 49.69 | 85.17 | -0.31098 | 0.00066  |
| BrCN             | -2667.05901  | 1.7892 | 46.48 | 53.52 | 86.15 | -0.38824 | -0.02093 |
| trans-Br2-ethene | -5225.86143  | 1.8822 | 50.66 | 49.34 | 85.53 | -0.30987 | -0.00384 |
| Br-ethene        | -2652.21867  | 1.8899 | 51.91 | 48.09 | 85.05 | -0.31768 | 0.01788  |
| EtBr             | -2653.45244  | 1.9556 | 53.18 | 46.82 | 86.82 | -0.33434 | 0.00572  |
| C2F5Br           | -3149.72256  | 1.9256 | 49.78 | 50.22 | 89.14 | -0.39189 | -0.01453 |
| C2Cl5Br          | -4951.45382  | 1.9448 | 45.40 | 54.60 | 86.89 | -0.36050 | -0.03252 |
| <hr/>            |              |        |       |       |       |          |          |
| MeI              | -335.52522   | 2.1392 | 48.01 | 51.99 | 89.76 | -0.31171 | -0.01363 |
| CF3I             | -633.28595   | 2.1461 | 46.03 | 53.97 | 92.88 | -0.35174 | -0.04100 |
| CCl3I            | -1714.32035  | 2.1630 | 38.38 | 61.62 | 92.01 | -0.33815 | -0.06401 |
| CBr3I            | -8056.42047  | 2.1570 | 37.77 | 62.23 | 91.35 | -0.33046 | -0.07779 |
| Cl4              | -1220.56809  | 2.1591 | 38.75 | 61.25 | 90.53 | -0.31219 | -0.09689 |
| EtI              | -374.83380   | 2.1568 | 48.89 | 51.11 | 89.99 | -0.30838 | -0.00821 |
| C2F5I            | -871.10171   | 2.1454 | 44.66 | 55.34 | 92.32 | -0.35438 | -0.04438 |
| C2Cl5I           | -2672.83568  | 2.1675 | 38.65 | 61.35 | 91.06 | -0.33390 | -0.05805 |
| PhI              | -527.24925   | 2.1003 | 45.74 | 54.26 | 88.62 | -0.29274 | -0.00791 |
| 1,3,5-I3Ph       | -1117.29646  | 2.0965 | 44.72 | 55.28 | 88.97 | -0.30446 | -0.04208 |

|                 |              |        |       |       |       |          |          |
|-----------------|--------------|--------|-------|-------|-------|----------|----------|
| C6F5I           | -1023.46959  | 2.0755 | 41.62 | 58.38 | 89.92 | -0.31880 | -0.03835 |
| C6Cl5I          | -2825.27360  | 2.0879 | 41.79 | 58.21 | 89.78 | -0.31030 | -0.04379 |
| C6Br5I          | -13395.43528 | 2.0954 | 41.78 | 58.22 | 89.88 | -0.30695 | -0.06034 |
| 4ClPhI          | -986.85930   | 2.0969 | 45.23 | 54.77 | 88.72 | -0.29422 | -0.01327 |
| 3ClPhI          | -986.85922   | 2.0968 | 45.13 | 54.87 | 88.80 | -0.30039 | -0.01490 |
| 3,5-Cl2PhI      | -1446.46795  | 2.0953 | 44.60 | 55.40 | 89.00 | -0.30868 | -0.02292 |
| 2,6-Cl2PhI      | -1446.46304  | 2.0866 | 42.63 | 57.37 | 89.36 | -0.30365 | -0.02288 |
| 2,4,6-Cl3PhI    | -1906.07114  | 2.0844 | 42.32 | 57.68 | 89.43 | -0.30443 | -0.02861 |
| 4FPhI           | -626.50059   | 2.0978 | 45.28 | 54.72 | 88.74 | -0.29427 | -0.01149 |
| 3,5-F2PhI       | -725.75098   | 2.0944 | 44.55 | 55.45 | 88.96 | -0.30857 | -0.01806 |
| 2,6-F2PhI       | -725.74898   | 2.0776 | 42.72 | 57.28 | 89.48 | -0.30352 | -0.01486 |
| 2,4,6-F3PhI     | -824.99847   | 2.0763 | 42.38 | 57.62 | 89.59 | -0.30524 | -0.01904 |
| 2,3,5,6F4PhI2   | -822.27324   | 2.0971 | 45.24 | 54.76 | 88.73 | -0.28924 | -0.01803 |
| 1,4-I2Ph        | -1219.25319  | 2.0745 | 41.74 | 58.26 | 89.84 | -0.30907 | -0.04077 |
| 4MePhI          | -566.56022   | 2.0998 | 45.83 | 54.17 | 88.57 | -0.28518 | -0.00605 |
| 2,4,6-Me3PhI    | -645.18419   | 2.1128 | 47.08 | 52.92 | 88.49 | -0.28017 | -0.00155 |
| 4-MeOPhI        | -641.77502   | 2.0969 | 45.68 | 54.32 | 88.58 | -0.27455 | -0.00563 |
| 4NO2PhI         | -731.76116   | 2.0931 | 44.69 | 55.31 | 88.79 | -0.31741 | -0.06861 |
| 4NMe2PhI        | -661.20670   | 2.0978 | 46.00 | 54.00 | 88.51 | -0.24762 | -0.00629 |
| 4CNPhI          | -619.49631   | 2.0944 | 44.82 | 55.18 | 88.80 | -0.31111 | -0.04206 |
| 4COOHPhI        | -715.84289   | 2.0960 | 45.26 | 54.74 | 88.66 | -0.30432 | -0.03837 |
| 4CONH2PhI       | -695.96427   | 2.0967 | 45.33 | 54.67 | 88.66 | -0.30106 | -0.02903 |
| 4CONHMePhI      | -735.26500   | 2.0959 | 45.39 | 54.61 | 88.62 | -0.29848 | -0.02461 |
| 4I-Pyr          | -543.28948   | 2.0955 | 45.07 | 54.93 | 88.69 | -0.31470 | -0.01730 |
| HCCI            | -372.34625   | 1.9925 | 40.99 | 59.01 | 88.06 | -0.31895 | -0.01251 |
| MeCCI           | -411.66435   | 1.9938 | 41.18 | 58.82 | 88.17 | -0.30266 | -0.00531 |
| ICCI            | -667.36791   | 1.9905 | 40.37 | 59.63 | 88.53 | -0.30281 | -0.02681 |
| 14-ethene       | -1258.66250  | 2.0956 | 41.01 | 58.99 | 89.75 | -0.29643 | -0.04502 |
| cis-12-ethene   | -668.62434   | 2.0766 | 45.28 | 54.72 | 88.92 | -0.29816 | -0.02333 |
| trans-12-ethene | -668.62513   | 2.0920 | 45.81 | 54.19 | 89.29 | -0.29655 | -0.03053 |
| 1-ethene        | -373.59932   | 2.0897 | 46.99 | 53.01 | 88.67 | -0.30280 | -0.00338 |
| ICN             | -388.44518   | 1.9976 | 40.29 | 59.71 | 89.93 | -0.36227 | -0.04388 |
| ICCCN           | -464.59289   | 1.9837 | 39.78 | 60.22 | 88.66 | -0.34171 | -0.03497 |
| 4HCCPhI         | -603.39384   | 1.9908 | 40.99 | 59.01 | 88.21 | -0.28426 | -0.01517 |

## RX-SeMe2 XB complexes

|              | E, a.u.      | Se-X, ang | C-X, ang | dC-X   | WBI $\Delta E$<br>kcal/mol | NBO $\Delta E_{d \rightarrow a}$<br>kcal/mol |      |
|--------------|--------------|-----------|----------|--------|----------------------------|----------------------------------------------|------|
| MeCl         | -2981.53567  | 3.5591    | 1.7849   | 0.0024 | 0.0139                     | -1.98                                        | 1.29 |
| CF3Cl        | -3279.30640  | 3.4356    | 1.7575   | 0.0001 | 0.0217                     | -2.80                                        | 2.47 |
| CCl4         | -4360.33632  | 3.3671    | 1.7711   | 0.0027 | 0.0290                     | -3.19                                        | 3.03 |
| PhCl         | -3173.26465  | 3.5768    | 1.7418   | 0.0012 | 0.0135                     | -2.15                                        | 1.09 |
| 4Cl-Pyr      | -3189.30515  | 3.5187    | 1.7345   | 0.0003 | 0.0162                     | -2.18                                        | 1.53 |
| 1,3,5-Cl3Ph  | -4092.48319  | 3.5112    | 1.7350   | 0.0016 | 0.0165                     | -2.28                                        | 1.56 |
| EtCl         | -3020.84623  | 3.5908    | 1.7980   | 0.0012 | 0.0122                     | -1.93                                        | 1.12 |
| C6F5Cl       | -3669.48084  | 3.4327    | 1.7155   | 0.0035 | 0.0217                     | -2.69                                        | 2.31 |
| C6Cl6        | -5471.28961  | 3.4512    | 1.7185   | 0.0017 | 0.0181                     | -2.80                                        | 1.78 |
| 3,4,5-Cl3Pyr | -4108.51755  | 3.449     | 1.7137   | 0.0015 | 0.0192                     | -2.72                                        | 2.08 |
| HCCCl        | -3018.35688  | 3.4495    | 1.6430   | 0.0033 | 0.0213                     | -2.78                                        | 1.94 |
| MeCCCl       | -3057.67416  | 3.4614    | 1.6481   | 0.0035 | 0.0193                     | -2.61                                        | 1.80 |
| MeBr         | -5095.57258  | 3.5998    | 1.9412   | 0.0018 | 0.0213                     | -2.73                                        | 2.32 |
| Cf3Br        | -5393.33905  | 3.4129    | 1.9312   | 0.0045 | 0.0383                     | -3.95                                        | 5.15 |
| CCl3Br       | -6474.37148  | 3.3351    | 1.9515   | 0.0072 | 0.0571                     | -4.64                                        | 6.93 |
| CBr4         | -12816.47157 | 3.3238    | 1.9470   | 0.0106 | 0.0597                     | -4.39                                        | 6.90 |
| CH2Br2       | -7669.21095  | 3.4934    | 1.9303   | 0.0042 | 0.0304                     | -3.31                                        | 3.48 |
| PhBr         | -5287.29930  | 3.5766    | 1.8986   | 0.0024 | 0.0226                     | -2.84                                        | 2.35 |
| C6F5Br       | -5783.51798  | 3.4046    | 1.8769   | 0.0091 | 0.0405                     | -3.90                                        | 4.69 |
| C6Cl5Br      | -7585.32457  | 3.4429    | 1.8826   | 0.0073 | 0.0347                     | -3.92                                        | 3.21 |
| C6Br6        | -18155.48716 | 3.407     | 1.8862   | 0.0071 | 0.0381                     | -3.83                                        | 4.93 |
| 1,3,5-Br3Ph  | -10434.58532 | 3.5239    | 1.8940   | 0.0038 | 0.0276                     | -3.21                                        | 2.91 |
| 4ClPhBr      | -5746.90936  | 3.5598    | 1.8961   | 0.0034 | 0.0245                     | -2.92                                        | 2.53 |
| 4MePhBr      | -5326.61017  | 3.5871    | 1.8990   | 0.0028 | 0.0219                     | -2.82                                        | 2.28 |
| 4NMe2PhBr    | -5421.25630  | 3.6162    | 1.8978   | 0.0017 | 0.0196                     | -2.76                                        | 1.95 |
| 4COOHPhBr    | -5475.89323  | 3.5499    | 1.8940   | 0.0031 | 0.0250                     | -2.95                                        | 2.64 |
| 4CONH2PhBr   | -5456.01461  | 3.5563    | 1.8949   | 0.0031 | 0.0245                     | -3.02                                        | 2.57 |
| 4CONHMePhBr  | -5495.31530  | 3.5612    | 1.8963   | 0.0037 | 0.0240                     | -2.98                                        | 2.50 |
| 4Br-Pyr      | -5303.33982  | 3.5503    | 1.8925   | 0.0029 | 0.0255                     | -3.01                                        | 2.66 |
| 3,4,5-Br3Pyr | -10450.61961 | 3.4299    | 1.8788   | 0.0065 | 0.0363                     | -3.87                                        | 4.15 |

|                  |              |        |        |        |        |       |      |
|------------------|--------------|--------|--------|--------|--------|-------|------|
| HCCBr            | -5132.39375  | 3.4222 | 1.8008 | 0.0092 | 0.0375 | -3.89 | 4.12 |
| MeCCBr           | -5171.71132  | 3.4473 | 1.8033 | 0.0080 | 0.0335 | -3.68 | 3.60 |
| Br4-ethene       | -12854.56565 | 3.3952 | 1.8837 | 0.0069 | 0.0427 | -3.81 | 4.99 |
| cis-Br2-ethene   | -7707.29214  | 3.5521 | 1.8752 | 0.0038 | 0.0250 | -2.97 | 2.62 |
| BrCN             | -5148.49300  | 3.331  | 1.8040 | 0.0148 | 0.0532 | -5.13 | 6.29 |
| trans-Br2-ethene | -7707.29207  | 3.54   | 1.8870 | 0.0048 | 0.0259 | -3.03 | 2.81 |
| Br-ethene        | -5133.64885  | 3.6007 | 1.8912 | 0.0013 | 0.0212 | -2.74 | 2.16 |
| EtBr             | -5134.88233  | 3.631  | 1.9562 | 0.0006 | 0.0192 | -2.56 | 1.98 |
| C2F5Br           | -5631.15463  | 3.3966 | 1.9306 | 0.0050 | 0.0411 | -3.93 | 5.56 |
| C2Cl5Br          | -7432.88667  | 3.34   | 1.9539 | 0.0091 | 0.0564 | -4.42 | 6.87 |

---

|               |              |        |        |        |        |       |       |
|---------------|--------------|--------|--------|--------|--------|-------|-------|
| Mel           | -2816.95700  | 3.616  | 2.1442 | 0.0050 | 0.0374 | -3.75 | 4.54  |
| CF3I          | -3114.72101  | 3.4131 | 2.1558 | 0.0097 | 0.0707 | -5.80 | 10.14 |
| CCl3I         | -4195.75714  | 3.2821 | 2.1834 | 0.0204 | 0.1227 | -6.89 | 15.90 |
| CBr3I         | -10537.85779 | 3.2545 | 2.1818 | 0.0248 | 0.1349 | -7.22 | 16.90 |
| Cl4           | -3702.00449  | 3.2692 | 2.1802 | 0.0211 | 0.1291 | -6.65 | 15.37 |
| Etl           | -2856.26530  | 3.6549 | 2.1585 | 0.0017 | 0.0328 | -3.57 | 3.83  |
| C2F5I         | -3352.53720  | 3.3976 | 2.1572 | 0.0118 | 0.0779 | -6.07 | 10.80 |
| C2Cl5I        | -5154.27234  | 3.2841 | 2.1909 | 0.0234 | 0.1241 | -6.81 | 15.30 |
| PhI           | -3008.68154  | 3.6057 | 2.1053 | 0.0050 | 0.0392 | -4.07 | 4.08  |
| 1,3,5-I3Ph    | -3598.72952  | 3.5193 | 2.1054 | 0.0089 | 0.0519 | -4.55 | 5.73  |
| C6F5I         | -3504.90481  | 3.3989 | 2.0950 | 0.0195 | 0.0782 | -5.90 | 8.83  |
| C6Cl5I        | -5306.70833  | 3.4303 | 2.1041 | 0.0162 | 0.0705 | -5.60 | 5.52  |
| C6Br5I        | -15876.87007 | 3.4221 | 2.1107 | 0.0153 | 0.0736 | -5.63 | 7.51  |
| 4ClPhI        | -3468.29185  | 3.5867 | 2.1006 | 0.0037 | 0.0424 | -4.23 | 4.34  |
| 3ClPhI        | -3468.29211  | 3.5644 | 2.1027 | 0.0059 | 0.0449 | -4.44 | 4.75  |
| 3,5-Cl2PhI    | -3927.90122  | 3.5292 | 2.1028 | 0.0075 | 0.0507 | -4.68 | 5.37  |
| 2,6-Cl2PhI    | -3927.89684  | 3.4978 | 2.0981 | 0.0115 | 0.0569 | -5.01 | 6.15  |
| 2,4,6-Cl3PhI  | -4387.50525  | 3.4708 | 2.0976 | 0.0132 | 0.0621 | -5.21 | 6.79  |
| 4FPhI         | -3107.93311  | 3.5916 | 2.1014 | 0.0036 | 0.0416 | -4.21 | 4.27  |
| 3,5-F2PhI     | -3207.18415  | 3.5365 | 2.1018 | 0.0074 | 0.0496 | -4.62 | 5.17  |
| 2,6-F2PhI     | -3207.18277  | 3.4948 | 2.0894 | 0.0118 | 0.0566 | -5.01 | 6.27  |
| 2,4,6-F3PhI   | -3306.43259  | 3.4706 | 2.0901 | 0.0138 | 0.0614 | -5.21 | 6.83  |
| 2,3,5,6F4PhI2 | -3303.70589  | 3.5568 | 2.1035 | 0.0064 | 0.0453 | -4.29 | 4.91  |

|                 |             |        |        |        |        |       |       |
|-----------------|-------------|--------|--------|--------|--------|-------|-------|
| 1,4-I2Ph        | -3700.68825 | 3.4083 | 2.0926 | 0.0181 | 0.0755 | -5.80 | 8.54  |
| 4MePhI          | -3047.99240 | 3.6145 | 2.1021 | 0.0023 | 0.0378 | -4.00 | 3.91  |
| 2,4,6-Me3PhI    | -3126.61592 | 3.6235 | 2.1163 | 0.0035 | 0.0358 | -3.71 | 4.09  |
| 4-MeOPhI        | -3123.20730 | 3.6043 | 2.1018 | 0.0049 | 0.0386 | -4.06 | 4.04  |
| 4NO2PHI         | -3213.19439 | 3.5288 | 2.1005 | 0.0074 | 0.0509 | -4.66 | 5.40  |
| 4NMe2PhI        | -3142.63871 | 3.6049 | 2.1011 | 0.0033 | 0.0371 | -3.89 | 4.02  |
| 4CNPhI          | -3100.92933 | 3.5568 | 2.0994 | 0.0050 | 0.0474 | -4.52 | 4.86  |
| 4COOHPhI        | -3197.27557 | 3.567  | 2.1014 | 0.0054 | 0.0444 | -4.31 | 4.66  |
| 4CONH2PhI       | -3177.39699 | 3.5715 | 2.1010 | 0.0043 | 0.0437 | -4.34 | 4.59  |
| 4CONHMePhI      | -3216.69762 | 3.5749 | 2.1010 | 0.0051 | 0.0430 | -4.27 | 4.51  |
| 4I-Pyr          | -3024.72230 | 3.5437 | 2.1025 | 0.0070 | 0.0476 | -4.40 | 5.19  |
| HCCI            | -2853.78134 | 3.435  | 2.0107 | 0.0182 | 0.0668 | -5.82 | 7.25  |
| MeCCI           | -2893.09886 | 3.4746 | 2.0093 | 0.0155 | 0.0586 | -5.46 | 6.00  |
| ICCI            | -3148.80337 | 3.4181 | 2.0106 | 0.0201 | 0.0711 | -6.06 | 7.62  |
| I4-ethene       | -3740.09762 | 3.387  | 2.1150 | 0.0194 | 0.0848 | -5.84 | 9.70  |
| cis-I2-ethene   | -3150.05693 | 3.5578 | 2.0849 | 0.0083 | 0.0455 | -4.25 | 5.27  |
| trans-I2-ethene | -3150.05799 | 3.5379 | 2.0996 | 0.0076 | 0.0491 | -4.42 | 5.78  |
| I-ethene        | -2855.03137 | 3.6028 | 2.0958 | 0.0061 | 0.0382 | -3.92 | 4.40  |
| ICN             | -2869.88357 | 3.2953 | 2.0314 | 0.0338 | 0.1069 | -7.89 | 13.84 |
| ICCCN           | -2946.03012 | 3.3481 | 2.0098 | 0.0261 | 0.0908 | -7.17 | 9.72  |
| 4HCCPhI         | -3084.82873 | 3.4424 | 2.0081 | 0.0173 | 0.0647 | -5.70 | 6.90  |

---

|             | RX-Cl XB complexes |           |          |         |                        |            |       |
|-------------|--------------------|-----------|----------|---------|------------------------|------------|-------|
|             | E, a.u.            | Se-X, ang | C-X, ang | dC-X    | WBI delta E (kcal/mol) | NBO dEd->a |       |
| MeCl        | -960.38017         | 3.3012    | 1.7788   | -0.0037 | 0.0232                 | 0.88       | 2.89  |
| CF3Cl       | -1258.16747        | 2.9914    | 1.7369   | -0.0205 | 0.0528                 | -10.33     | 7.69  |
| CCl4        | -2339.19774        | 2.8834    | 1.7572   | -0.0112 | 0.0583                 | -10.94     | 11.36 |
| PhCl        | -1152.11465        | 3.1306    | 1.7277   | -0.0129 | 0.0330                 | -2.74      | 4.33  |
| 4Cl-Pyr     | -1168.16112        | 3.0841    | 1.7190   | -0.0152 | 0.0388                 | -6.52      | 5.03  |
| 1,3,5-Cl3Ph | -2071.34067        | 3.0531    | 1.7227   | -0.0107 | 0.0442                 | -7.57      | 5.59  |
| EtCl        | -999.69003         | 3.3412    | 1.7852   | -0.0116 | 0.0200                 | 1.37       | 2.52  |
| C6F5Cl      | -1648.34214        | 2.9663    | 1.7169   | 0.0049  | 0.0635                 | -10.37     | 7.84  |
| C6Cl6       | -3450.15007        | 2.9693    | 1.7146   | -0.0022 | 0.0601                 | -9.96      | 7.07  |

|                  |              |        |        |         |        |        |       |
|------------------|--------------|--------|--------|---------|--------|--------|-------|
| 3,4,5-Cl3Pyr     | -2087.37637  | 3.0009 | 1.7069 | -0.0053 | 0.0535 | -8.85  | 6.78  |
| HCCCl            | -997.21558   | 3.0313 | 1.6466 | 0.0069  | 0.0434 | -8.83  | 5.94  |
| MeCCCl           | -1036.52928  | 3.0588 | 1.6510 | 0.0064  | 0.0395 | -6.41  | 5.22  |
| MeBr             | -3074.42125  | 3.1677 | 1.9486 | 0.0092  | 0.0565 | -2.48  | 7.54  |
| Cf3Br            | -3372.20580  | 2.8937 | 1.9304 | 0.0037  | 0.1163 | -15.05 | 18.88 |
| CCl3Br           | -4453.24120  | 2.714  | 1.9864 | 0.0421  | 0.2333 | -17.60 | 37.64 |
| CBr4             | -10795.34267 | 2.6706 | 1.9937 | 0.0573  | 0.2633 | -18.22 | 43.16 |
| CH2Br2           | -5648.06861  | 2.995  | 1.9315 | 0.0054  | 0.0960 | -8.70  | 12.83 |
| PhBr             | -3266.15363  | 3.0805 | 1.8973 | 0.0011  | 0.0672 | -6.14  | 9.10  |
| C6F5Br           | -3762.38603  | 2.849  | 1.9099 | 0.0421  | 0.1430 | -15.81 | 20.38 |
| C6Cl5Br          | -5564.19146  | 2.8567 | 1.9076 | 0.0323  | 0.1380 | -15.10 | 21.71 |
| C6Br6            | -16134.35470 | 2.8394 | 1.9128 | 0.0337  | 0.1479 | -15.43 | 23.14 |
| 1,3,5-Br3Ph      | -8413.44831  | 2.9631 | 1.8997 | 0.0095  | 0.0984 | -11.95 | 13.40 |
| 4ClPhBr          | -3725.76800  | 3.0331 | 1.8972 | 0.0045  | 0.0780 | -8.94  | 10.63 |
| 4MePhBr          | -3305.46342  | 3.0885 | 1.8975 | 0.0013  | 0.0656 | -5.45  | 8.89  |
| 4NMe2PhBr        | -3400.10669  | 3.1093 | 1.8979 | 0.0018  | 0.0600 | -3.60  | 8.28  |
| 4COOHPhBr        | -3454.75344  | 3.0136 | 1.8923 | 0.0014  | 0.0818 | -9.95  | 11.18 |
| 4CONH2PhBr       | -3434.87380  | 3.0241 | 1.8937 | 0.0019  | 0.0794 | -9.37  | 10.84 |
| 4CONHMePhBr      | -3474.17369  | 3.0293 | 1.8944 | 0.0018  | 0.0781 | -8.84  | 10.66 |
| 4Br-Pyr          | -3282.20032  | 3.0196 | 1.8919 | 0.0023  | 0.0806 | -10.18 | 11.02 |
| 3,4,5-Br3Pyr     | -8429.48481  | 2.8904 | 1.8945 | 0.0222  | 0.1240 | -13.99 | 17.95 |
| HCCBr            | -3111.25779  | 2.9552 | 1.8224 | 0.0308  | 0.0918 | -13.29 | 13.66 |
| MeCCBr           | -3150.57149  | 2.9861 | 1.8240 | 0.0287  | 0.0836 | -10.65 | 12.03 |
| Br4-ethene       | -10833.43331 | 2.8205 | 1.9101 | 0.0333  | 0.1606 | -15.48 | 23.17 |
| cis-Br2-ethene   | -5686.14937  | 3.0366 | 1.8797 | 0.0083  | 0.0763 | -8.09  | 10.42 |
| BrCN             | -3127.37161  | 2.7959 | 1.8464 | 0.0572  | 0.1491 | -23.68 | 25.37 |
| trans-Br2-ethene | -5686.15224  | 3.0044 | 1.8934 | 0.0112  | 0.0866 | -10.00 | 11.67 |
| Br-ethene        | -3112.50175  | 3.1237 | 1.8878 | -0.0021 | 0.0576 | -5.15  | 7.84  |
| EtBr             | -3113.73011  | 3.1803 | 1.9553 | -0.0003 | 0.0527 | -1.76  | 7.16  |
| C2F5Br           | -3610.02350  | 2.8607 | 1.9357 | 0.0101  | 0.1335 | -16.36 | 21.31 |
| C2Cl5Br          | -5411.75735  | 2.6888 | 2.0105 | 0.0657  | 0.2560 | -17.98 | 41.81 |
| Mel              | -795.81398   | 3.0907 | 2.1705 | 0.0313  | 0.1173 | -8.72  | 15.48 |

|               |              |        |        |        |        |        |       |
|---------------|--------------|--------|--------|--------|--------|--------|-------|
| CF3I          | -1093.59911  | 2.8189 | 2.1903 | 0.0442 | 0.2248 | -24.03 | 40.41 |
| CCl3I         | -2174.64105  | 2.6882 | 2.2563 | 0.0933 | 0.3627 | -28.76 | 64.76 |
| CBr3I         | -8516.74372  | 2.6588 | 2.2680 | 0.1110 | 0.3953 | -30.36 | 69.64 |
| Cl4           | -1680.89055  | 2.6424 | 2.2775 | 0.1184 | 0.4136 | -29.86 | 71.07 |
| Etl           | -835.12107   | 3.102  | 2.1764 | 0.0196 | 0.1120 | -7.78  | 14.67 |
| C2F5I         | -1331.41764  | 2.7928 | 2.2019 | 0.0565 | 0.2499 | -25.77 | 43.59 |
| C2Cl5I        | -3133.15791  | 2.6718 | 2.2946 | 0.1271 | 0.3912 | -29.72 | 69.06 |
| PhI           | -987.54461   | 2.9918 | 2.1336 | 0.0333 | 0.1460 | -12.86 | 18.27 |
| 1,3,5-I3Ph    | -1577.60282  | 2.868  | 2.1501 | 0.0536 | 0.2104 | -19.76 | 27.92 |
| C6F5I         | -1483.78571  | 2.7623 | 2.1827 | 0.1072 | 0.2766 | -25.88 | 41.99 |
| C6Cl5I        | -3285.58817  | 2.7643 | 2.1854 | 0.0975 | 0.2814 | -24.91 | 62.03 |
| C6Br5I        | -13855.75064 | 2.7452 | 2.1979 | 0.1025 | 0.2964 | -25.41 | 71.99 |
| 4ClPhI        | -1447.15984  | 2.9428 | 2.1382 | 0.0413 | 0.1670 | -16.11 | 21.51 |
| 3ClPhI        | -1447.16019  | 2.9248 | 2.1393 | 0.0425 | 0.1749 | -16.38 | 22.70 |
| 3,5-Cl2PhI    | -1906.77387  | 2.8848 | 2.1465 | 0.0512 | 0.1973 | -19.48 | 26.25 |
| 2,6-Cl2PhI    | -1906.76655  | 2.8466 | 2.1599 | 0.0733 | 0.2253 | -17.97 | 32.04 |
| 2,4,6-Cl3PhI  | -2366.37944  | 2.816  | 2.1600 | 0.0756 | 0.2446 | -20.98 | 35.79 |
| 4FPhI         | -1086.79949  | 2.9594 | 2.1385 | 0.0407 | 0.1601 | -15.08 | 20.45 |
| 3,5-F2PhI     | -1186.05527  | 2.9066 | 2.1425 | 0.0481 | 0.1851 | -18.46 | 24.11 |
| 2,6-F2PhI     | -1186.05221  | 2.8546 | 2.1558 | 0.0782 | 0.2156 | -17.80 | 30.51 |
| 2,4,6-F3PhI   | -1285.30540  | 2.8297 | 2.1630 | 0.0867 | 0.2316 | -20.12 | 33.39 |
| 2,3,5,6F4PhI2 | -1282.57439  | 2.9353 | 2.1383 | 0.0412 | 0.1706 | -16.49 | 22.04 |
| 1,4-I2Ph      | -1679.56903  | 2.7607 | 2.1796 | 0.1051 | 0.2766 | -25.71 | 42.31 |
| 4MePhI        | -1026.85441  | 2.9983 | 2.1330 | 0.0332 | 0.1431 | -12.12 | 17.91 |
| 2,4,6-Me3PhI  | -1105.47772  | 3.0261 | 2.1404 | 0.0276 | 0.1252 | -11.71 | 17.11 |
| 4-MeOPhI      | -1102.06909  | 2.9931 | 2.1337 | 0.0368 | 0.1452 | -12.05 | 18.25 |
| 4NO2PHI       | -1192.07019  | 2.8884 | 2.1381 | 0.0450 | 0.1960 | -21.44 | 25.47 |
| 4NMe2PhI      | -1121.49769  | 3.0119 | 2.1305 | 0.0327 | 0.1372 | -10.12 | 17.16 |
| 4CNPhI        | -1079.80389  | 2.8999 | 2.1387 | 0.0443 | 0.1906 | -20.53 | 24.61 |
| 4COOHPhI      | -1176.14512  | 2.9284 | 2.1345 | 0.0385 | 0.1753 | -17.17 | 22.28 |
| 4CONH2PhI     | -1156.26547  | 2.9376 | 2.1349 | 0.0382 | 0.1684 | -16.52 | 21.67 |
| 4CONHMePhI    | -1195.56529  | 2.9429 | 2.1343 | 0.0384 | 0.1659 | -15.95 | 21.30 |
| 4I-Pyr        | -1003.59203  | 2.9361 | 2.1344 | 0.0389 | 0.1697 | -17.37 | 21.77 |
| HCCI          | -832.65534   | 2.8654 | 2.0782 | 0.0857 | 0.1975 | -21.47 | 27.37 |



|                 |             |        |        |        |        |        |       |
|-----------------|-------------|--------|--------|--------|--------|--------|-------|
| MeCCI           | -871.96869  | 2.8928 | 2.0737 | 0.0799 | 0.1829 | -18.49 | 24.28 |
| ICCI            | -1127.68102 | 2.812  | 2.0910 | 0.1005 | 0.2313 | -24.00 | 33.44 |
| l4-ethene       | -1718.97878 | 2.7132 | 2.2056 | 0.1100 | 0.3311 | -25.98 | 51.71 |
| cis-l2-ethene   | -1128.92422 | 2.9287 | 2.1219 | 0.0453 | 0.1735 | -15.69 | 24.14 |
| trans-l2-ethene | -1128.92856 | 2.8885 | 2.1478 | 0.0558 | 0.1991 | -17.92 | 27.70 |
| l-ethene        | -833.89245  | 3.0427 | 2.1168 | 0.0271 | 0.1251 | -11.46 | 16.25 |
| ICN             | -848.77431  | 2.7204 | 2.1358 | 0.1382 | 0.2876 | -34.05 | 52.73 |
| ICCCN           | -924.92180  | 2.74   | 2.0991 | 0.1154 | 0.2742 | -33.91 | 40.98 |
| 4HCCPhI         | -1063.70375 | 2.8407 | 2.0786 | 0.0878 | 0.2109 | -21.99 | 28.94 |

---

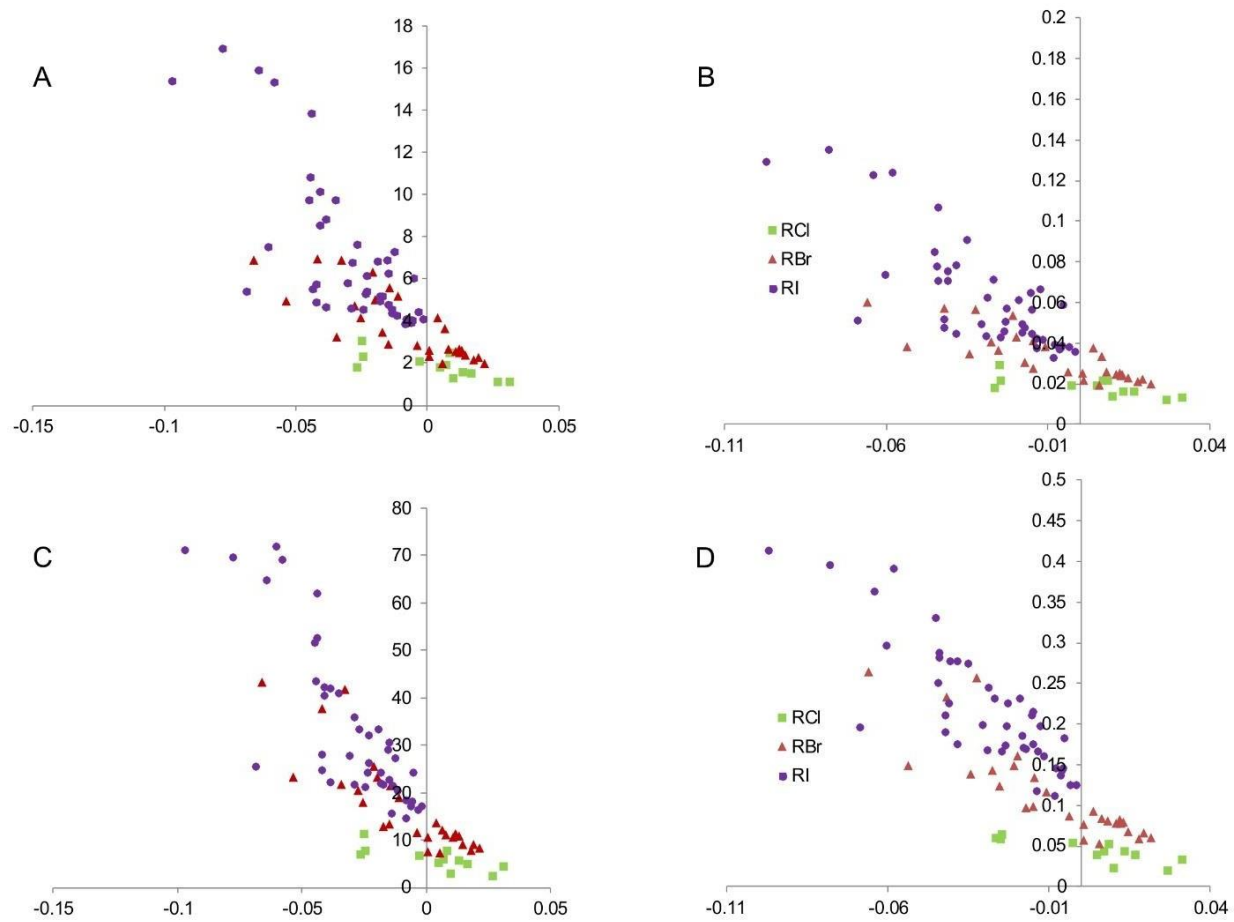

**Fig. S1** Correlation of the energy of the lowest R-X\* MO ( $\epsilon_{\phi_{R-X^*}}$ , a.u.) with several descriptors of the strength of the  $\text{Me}_2\text{Se}\cdots\text{XR}$  (A, B) and  $\text{Cl}\cdots\text{XR}$  (C, D) XB interactions: (A, C)  $\epsilon_{\phi_{R-X^*}}$  versus the NBO donor-acceptor energy of the XB complex ( $\Delta E_{d\rightarrow a}$ , kcal/mol); (B, D);  $\epsilon_{\phi_{R-X^*}}$  versus the Se $\cdots$ X Wiberg bond index (WBI).
